# Supplementary material for: MoSe2nanosheet/MoO2nanobelt/carbon nanotube membrane as flexible and multifunctional electrodes for full water splitting in acidic electrolyte
Source: Royal Society of Chemistry journal article supplement (doi:10.1039/c8nr01572d), 2018-01-01
Supplement: c8nr01572d1.pdf [file c8nr01572d1.pdf]

Electronic Supplementary Material (ESI) for Nanoscale.

This journal is © The Royal Society of Chemistry 2018

## Electronic Supporting Information

### **MoSe<sub>2</sub> Nanosheets/MoO<sub>2</sub> Nanobelts/Carbon Nanotubes Membrane as Flexible and Multifunctional Electrodes for Full Water Splitting in Acidic Electrolyte**

L. J. Yang,<sup>a,b</sup> Y. Q. Deng,<sup>b</sup> X. F. Zhang,<sup>c</sup> H. Liu,<sup>a,c\*</sup> and W. J. Zhou<sup>a,b\*</sup>

<sup>a</sup> Institute for Advanced Interdisciplinary Research (IAIR), University of Jinan, Jinan, 250022, China

<sup>b</sup> Guangzhou Key Laboratory for Surface Chemistry of Energy Materials, New Energy Research Institute, School of Environment and Energy, South China University of Technology, Guangzhou Higher Education Mega Center, Guangzhou, Guangdong, 510006, P. R. China

<sup>c</sup> State Key Laboratory of Crystal Materials, Center of Bio & Micro/Nano Functional Materials, Shandong University, 27 Shandan Road, Jinan, Shandong 250100, P. R. China

\* Corresponding author. E-mail: hongliu@sdu.edu.cn, eszhouwj@scut.edu.cn (W. Zhou)

**Table S1.** The comparison of MoSe<sub>2</sub>-based HER electrocatalysts reported in acid electrolyte.

| Catalysts                                                                                              | $\eta_{\text{onset}}$ (mV vs. RHE) | $\eta_{10}$ (mV) | Tafel slope (mV dec <sup>-1</sup> ) | Reference                                 |
|--------------------------------------------------------------------------------------------------------|------------------------------------|------------------|-------------------------------------|-------------------------------------------|
| MoSe <sub>2</sub> NSs/MoO <sub>2</sub> NBs/CNTs-M (3D electrode)                                       | □-23                               | 97               | 69.4                                | This work                                 |
| MoSe <sub>2</sub> film (3D electrode)                                                                  | -200                               | >400             | 105-120                             | Nano Lett. 2013, 13, 1341                 |
| MoSe <sub>2</sub> /carbon cloth (3D electrode)                                                         | -150                               | 220              | 76                                  | Sci. Rep. 2016, 6, 22516                  |
| CNT@MoSe <sub>2</sub> (powder)                                                                         | -70                                | 178              | 58                                  | Nanoscale, 2015, 7, 18595                 |
| MoSe <sub>2</sub> on carbon fiber paper (3D electrode)                                                 | -110                               | 250              | 59.8                                | Nano Lett. 2013, 13, 3426                 |
| MoSe <sub>2</sub> /RGO (powder)                                                                        | -50                                | 150              | 69                                  | J. Mater. Chem. A, 2014, 2, 360           |
| MoSe <sub>2</sub> /carbon fiber aerogel (powder)                                                       | -104                               | 179              | 62                                  | ACS Appl. Mater. Interfaces 2016, 8, 7077 |
| MoSe <sub>2</sub> /grapheme (3D electrode)                                                             | -50                                | 159              | 61                                  | Small, 2015, 11, 414                      |
| Carbonized bacterial cellulose/MoSe <sub>2</sub> (3D electrode)                                        | -91                                | -                | 55                                  | Small, 2017, 13, 1602866                  |
| MoSe <sub>2</sub> /Mo core-shell nanoscrews MoSe <sub>2</sub> /Mo core-shell nanoscrews (3D electrode) | -89                                | 166              | 34.7                                | Adv. Mater. 2016, 28, 9831                |
| MoSe <sub>2</sub> -porous carbon fiber (powder)                                                        | -40                                | -                | 65                                  | Adv. Mater. Interfaces 2017, 1600825      |

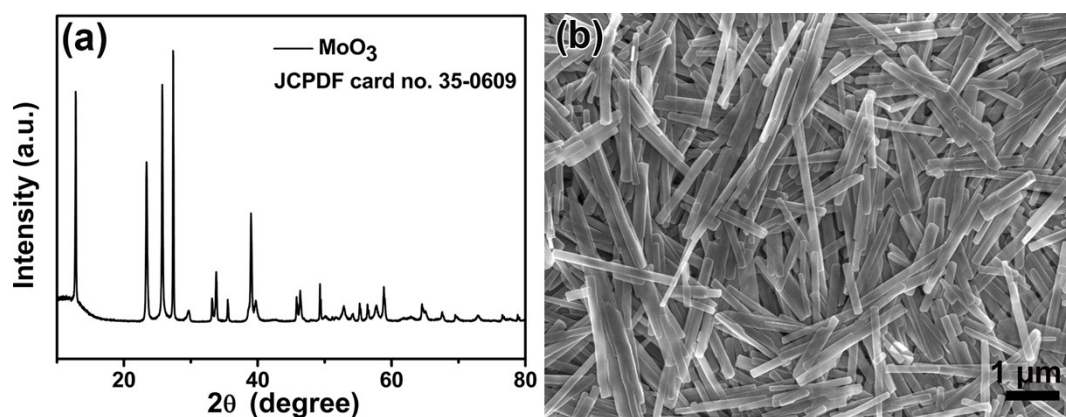

**Fig. S1** XRD (a) and SEM image (b) of  $\text{MoO}_3$  nanobelts.

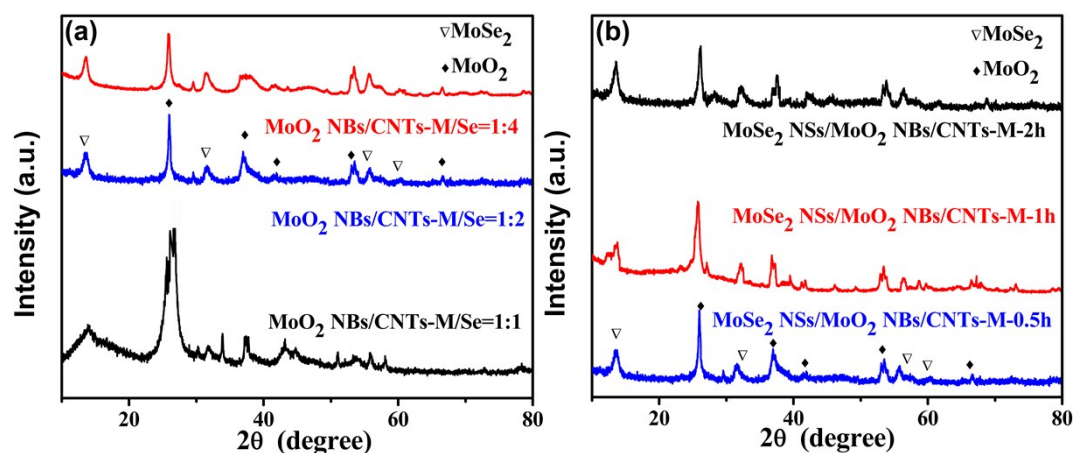

**Fig. S2** XRD of  $\text{MoSe}_2$  NSs/ $\text{MoO}_2$  NBs/CNTs-M obtained by changing amount of selenium (quality ratio of  $\text{MoO}_2$  NBs/CNTs/Se-1:1 (black line), -1:2 (blue line), -1:4 and blue line (red line) (a) and holding at this quality ratio of 1:2 for various selenylation times (0.5 h, 1.0 h or 2.0 h) (b).

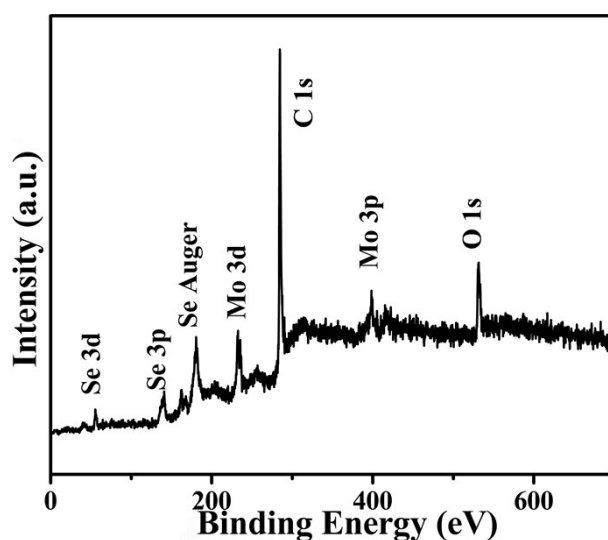

**Fig. S3** The XPS survey spectra of the  $\text{MoSe}_2$  NSs/ $\text{MoO}_2$  NBs/CNTs-M.

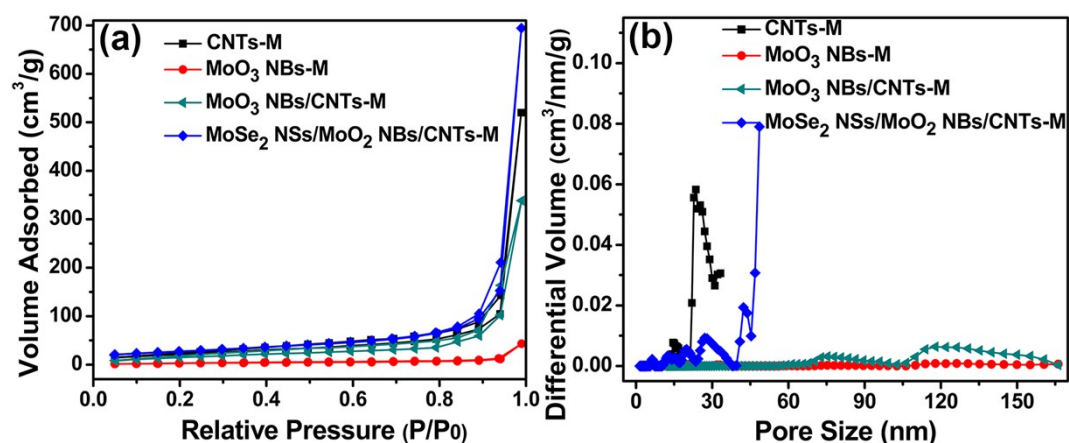

**Fig. S4** (a) Nitrogen adsorption-desorption isotherm and (b) pore size distributions of CNTs-M, MoO<sub>3</sub> NBs-M, MoO<sub>3</sub> NBs/CNTs-M, and MoSe<sub>2</sub> NSs/MoO<sub>2</sub> NBs/CNTs-M.

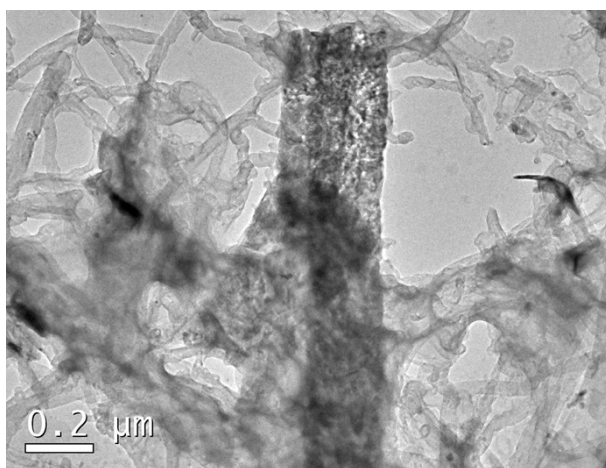

**Fig. S5** TEM images of MoSe<sub>2</sub> NSs/MoO<sub>2</sub> NBs/CNTs-M.

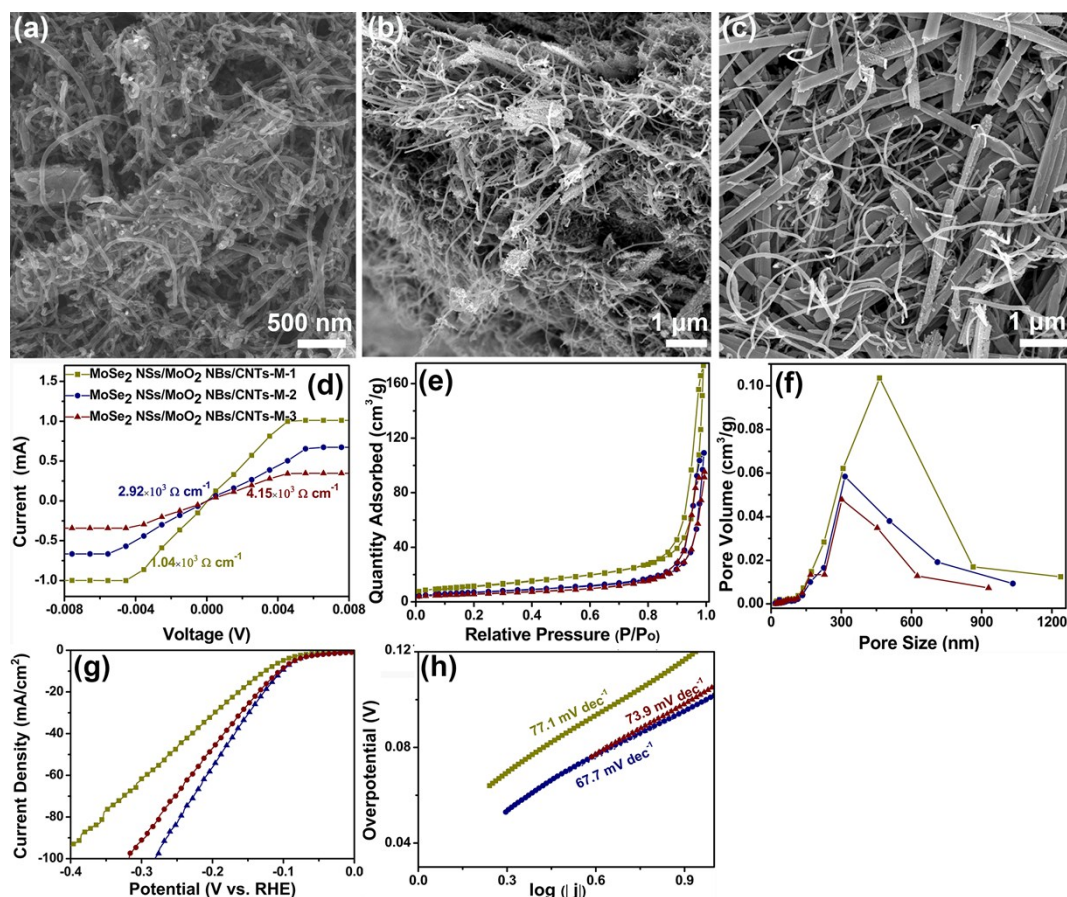

**Fig. S6** SEM images of (a) MoSe<sub>2</sub> NSs/MoO<sub>2</sub> NBs/CNTs-M-1, (b) MoSe<sub>2</sub> NSs/MoO<sub>2</sub> NBs/CNTs-M-2 and (c) MoSe<sub>2</sub> NSs/MoO<sub>2</sub> NBs/CNTs-M-3. (d) Current–voltage (I–V) characteristic, (e) Nitrogen adsorption-desorption isotherm, (f) Pore size distributions, (g) LSV curves and (h) according Tafel of MoSe<sub>2</sub> NSs/MoO<sub>2</sub> NBs/CNTs membrane derived from precursors regulated by mass ratio between MoO<sub>3</sub> NBs and CNTs, which were 1:1(MoSe<sub>2</sub> NSs/MoO<sub>2</sub> NBs/CNTs-M-1), 5:1(MoSe<sub>2</sub> NSs/MoO<sub>2</sub> NBs/CNTs-M-2), and 15:1(MoSe<sub>2</sub> NSs/MoO<sub>2</sub> NBs/CNTs-M-3), respectively.

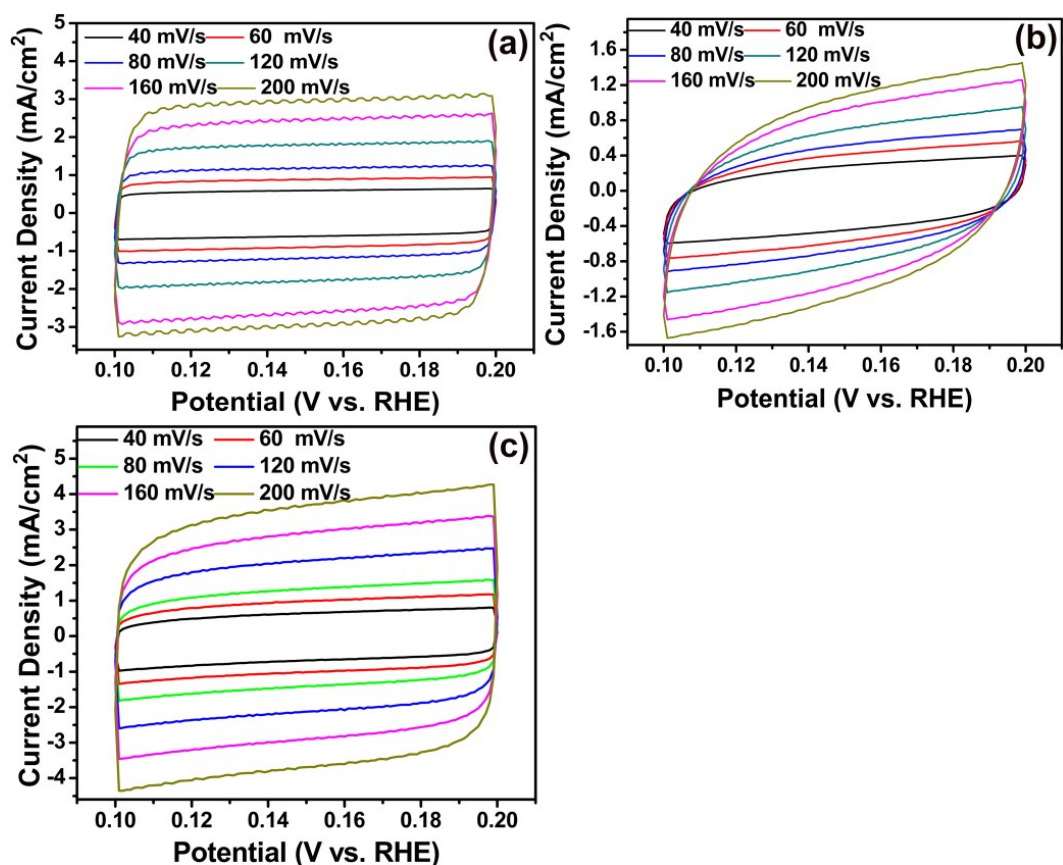

**Fig. S7** The CVs curves under various scan rates of CNTs-M (a), MoSe<sub>2</sub> NSs/MoO<sub>2</sub> NBs-M (b) and MoSe<sub>2</sub> NSs/MoO<sub>2</sub> NBs/CNTs-M (c).

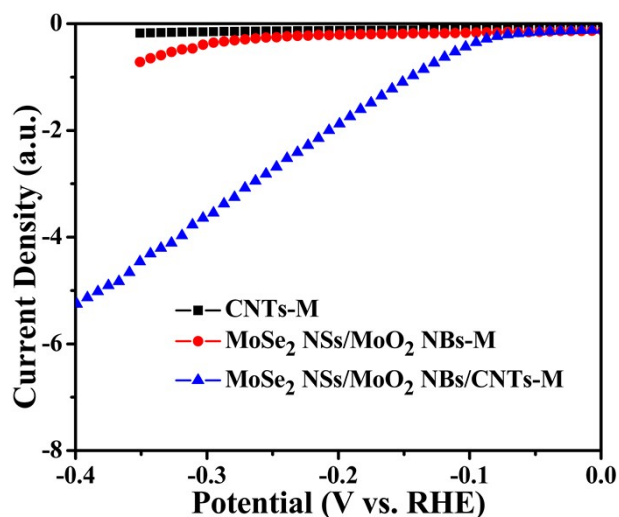

**Fig. S8** Polarization curves of MoSe<sub>2</sub> NSs/MoO<sub>2</sub> NBs/CNTs-M, CNTs-M, MoSe<sub>2</sub> NSs/MoO<sub>2</sub> NBs-M. The current density (y axis) was obtained by normalizing the HER currents to the respective electrochemical surface area.



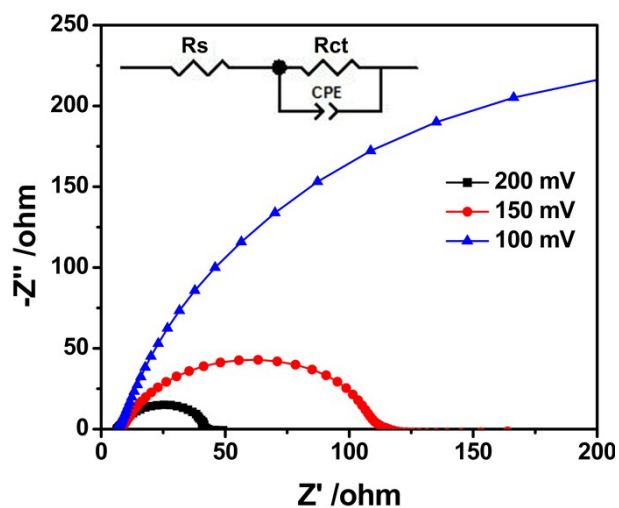

**Fig. S9** Nyquist plots of MoSe<sub>2</sub> NSs/MoO<sub>2</sub> NBs/CNTs-M at various overpotentials (Inset shows equivalent circuit diagram).

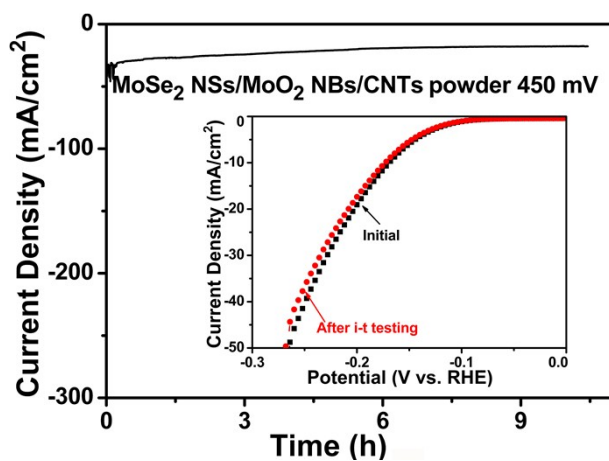

**Fig. S10** Chronoamperometric response for MoSe<sub>2</sub> NSs/MoO<sub>2</sub> NBs/CNTs powder (Inset shows Polarization curves of MoSe<sub>2</sub> NSs/MoO<sub>2</sub> NBs/CNTs powder before and after i-t testing).

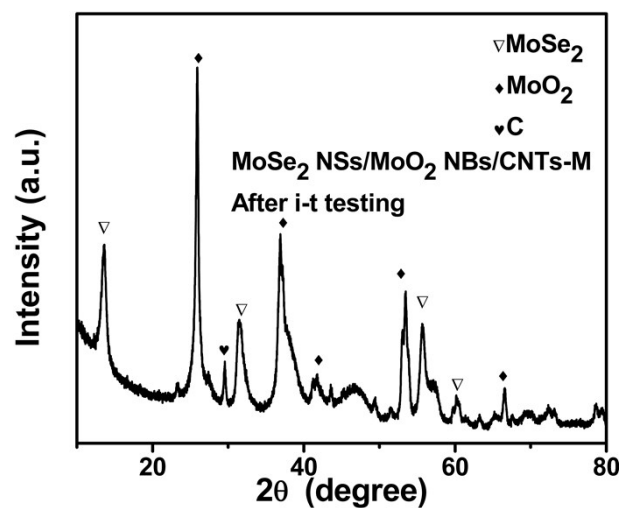

**Fig. S11** The crystal structure of MoSe<sub>2</sub> NSs/MoO<sub>2</sub> NBs/CNTs-M after i-t testing.

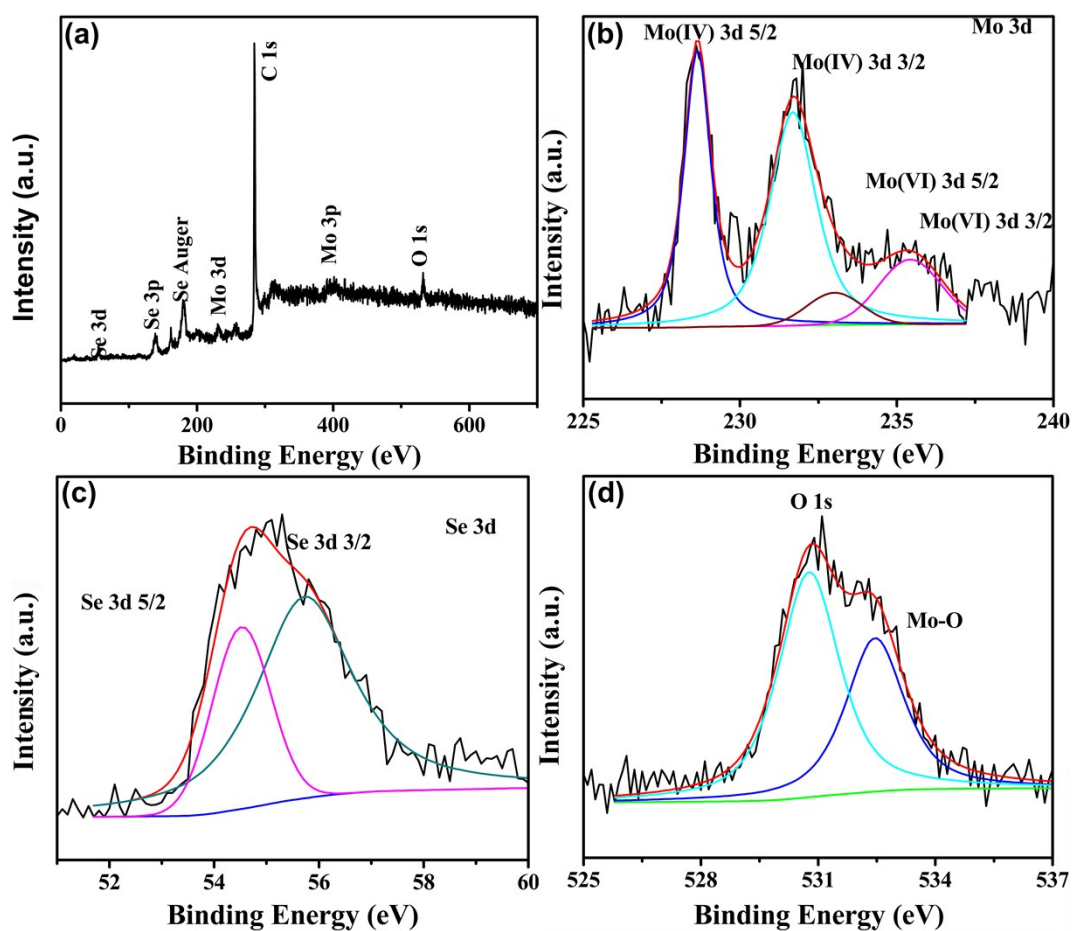

**Fig. S12** The XPS of MoSe<sub>2</sub> NSs/MoO<sub>2</sub> NBs/CNTs-M after i-t testing.



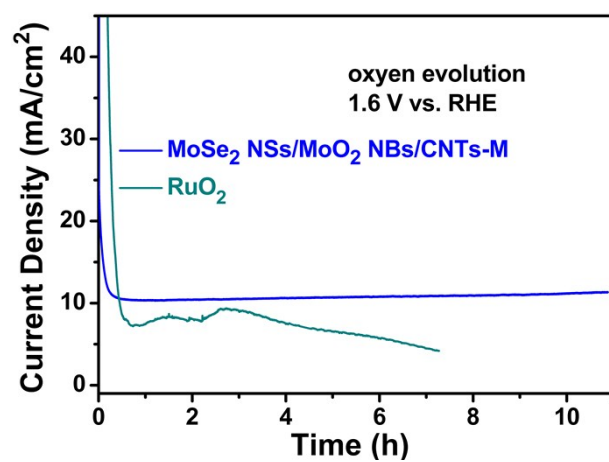

**Fig. S13** Chronoamperometric records of MoSe<sub>2</sub> NSs/MoO<sub>2</sub> NBs/CNTs-M and RuO<sub>2</sub> in 0.5 M H<sub>2</sub>SO<sub>4</sub>.
